# Supplementary material for: Alkyl selenol reactivity with common solvents and ligands: influences on phase control in nanocrystal synthesis
Source: Royal Society of Chemistry journal article supplement (doi:10.1039/d1nr06282d), 2021-12-06
Supplement: d1nr06282d1.pdf [file d1nr06282d1.pdf]

## SUPPORTING INFORMATION

### **Alkyl Selenol Reactivity with Common Solvents and Ligands: Influences on Phase Control in Nanocrystal Synthesis**

Eric A. Ho, Antony R. Peng and Janet E. Macdonald

#### **Table of contents**

|                |                                                                                                                                             |    |
|----------------|---------------------------------------------------------------------------------------------------------------------------------------------|----|
| Tab. S1:       | NMR Parameters .....                                                                                                                        | 2  |
| Figs. S1-S18:  | $^1\text{H}$ NMR of all DDSeH and ligand combinations at 25 °C, 155 °C and 220 °C .....                                                     | 3  |
| Figs. S19-S25: | $^{77}\text{Se}$ NMR of all DDSeH and ligand combinations at 25 °C and downfield $^{77}\text{Se}$ NMR of DDSeH + oleic acid at 220 °C ..... | 12 |
| Fig. S26:      | $^{77}\text{Se}$ NMR DDSeH in wet stearic acid and pXRD products from NC synthesis .....                                                    | 15 |
| Figs. S27-S28: | pXRD analysis of lead acetate paper .....                                                                                                   | 16 |
| Fig. S29:      | pXRD analysis of saturated amines of varying lengths .....                                                                                  | 17 |
| Fig. S30:      | pXRD analysis of NC synthesis from ODE with high-temperature preheat step .....                                                             | 17 |

**Table S1:** NMR parameters used for  $^1\text{H}$  and  $^{77}\text{Se}$  experiments.

|                      | $^1\text{H}$ -NMR | $^{77}\text{Se}$ -NMR | $^{77}\text{Se}$ -NMR<br>(for upfield<br>detection of<br>TOP:Se) |
|----------------------|-------------------|-----------------------|------------------------------------------------------------------|
| Number of Scans      | 16                | 128                   | 128                                                              |
| Spectral Width (ppm) | 13                | 1000                  | 1000                                                             |
| Recycle Delay (s)    | -                 | 5                     | 5                                                                |
| Centre Shift (ppm)   | 5                 | 250                   | -500                                                             |

**$^1\text{H}$  NMR of all DDSeH and ligand combinations at 25 °C, 155 °C and 220 °C.**

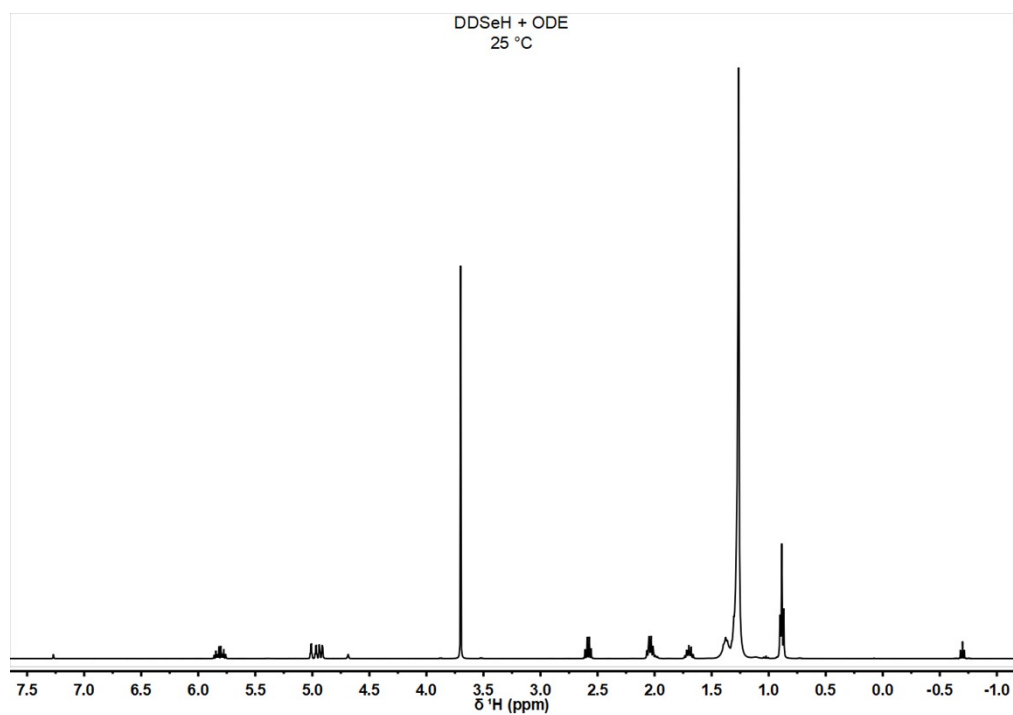

**Figure S1:**  $^1\text{H}$  NMR of DDSeH and ODE at 25 °C in  $\text{CDCl}_3$ . Dioxane internal standard at  $\delta = 3.71$  ppm

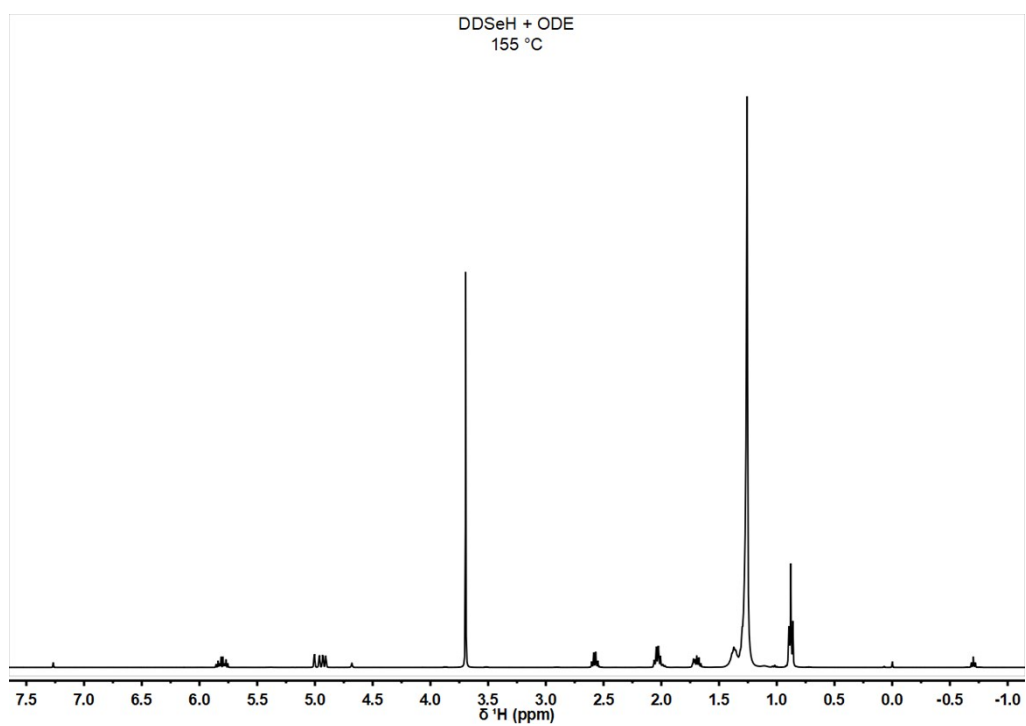

**Figure S2:**  $^1\text{H}$  NMR of DDSeH and ODE at 155 °C in  $\text{CDCl}_3$ . Dioxane internal standard at  $\delta = 3.71$  ppm

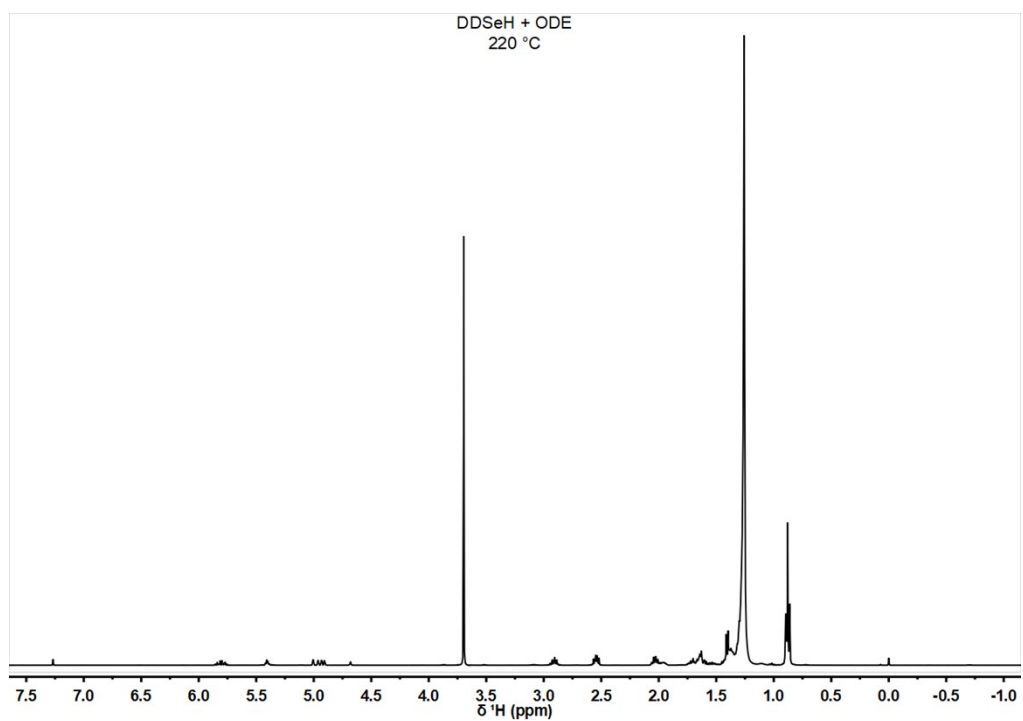

**Figure S3:**  $^1\text{H}$  NMR of DDSeH and ODE at 220 °C in  $\text{CDCl}_3$ . Dioxane internal standard at  $\delta = 3.71$  ppm

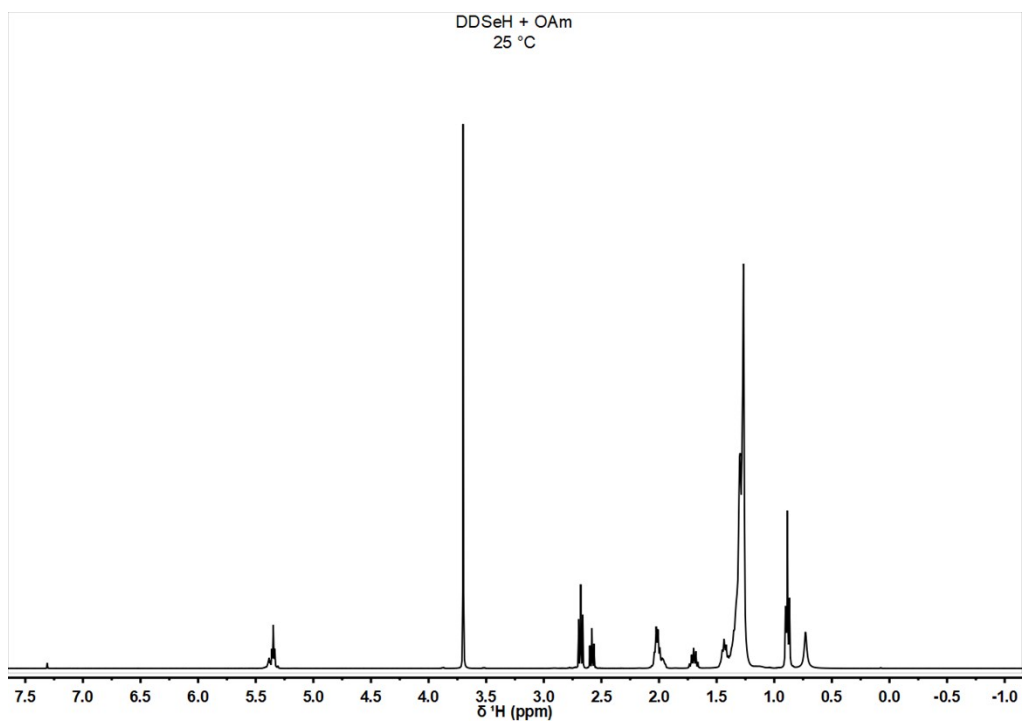

**Figure S4:**  $^1\text{H}$  NMR of DDSeH and oleylamine at 25 °C in  $\text{CDCl}_3$ . Dioxane internal standard at  $\delta = 3.71$  ppm

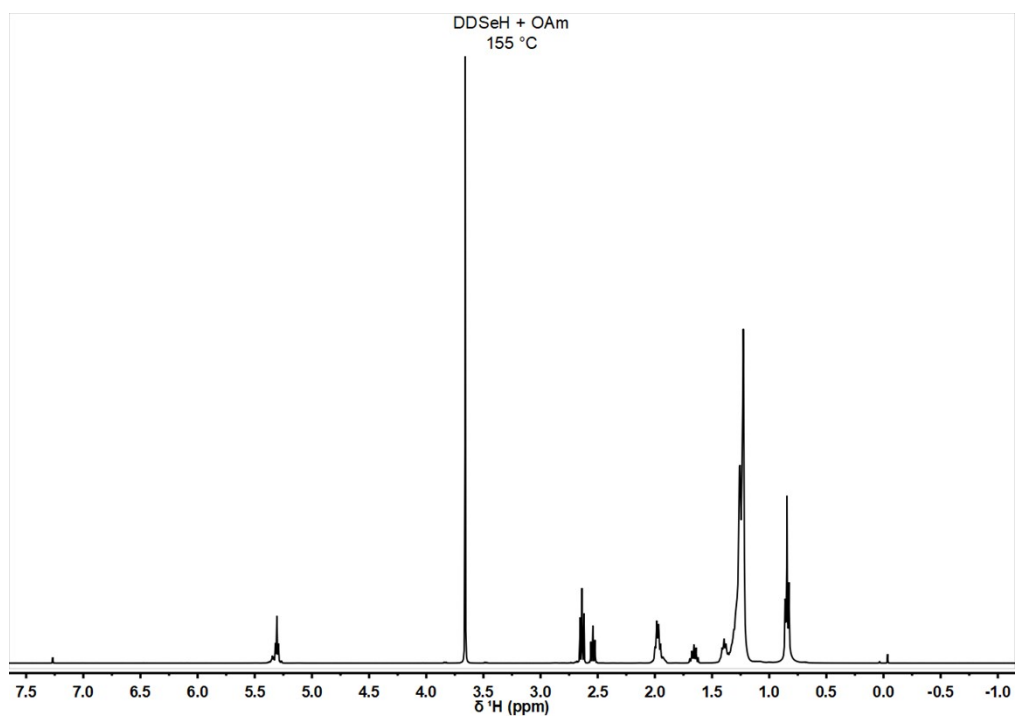

**Figure S5:**  $^1\text{H}$  NMR of DDSeH and oleylamine at 155 °C in  $\text{CDCl}_3$ . Dioxane internal standard at  $\delta = 3.71$  ppm

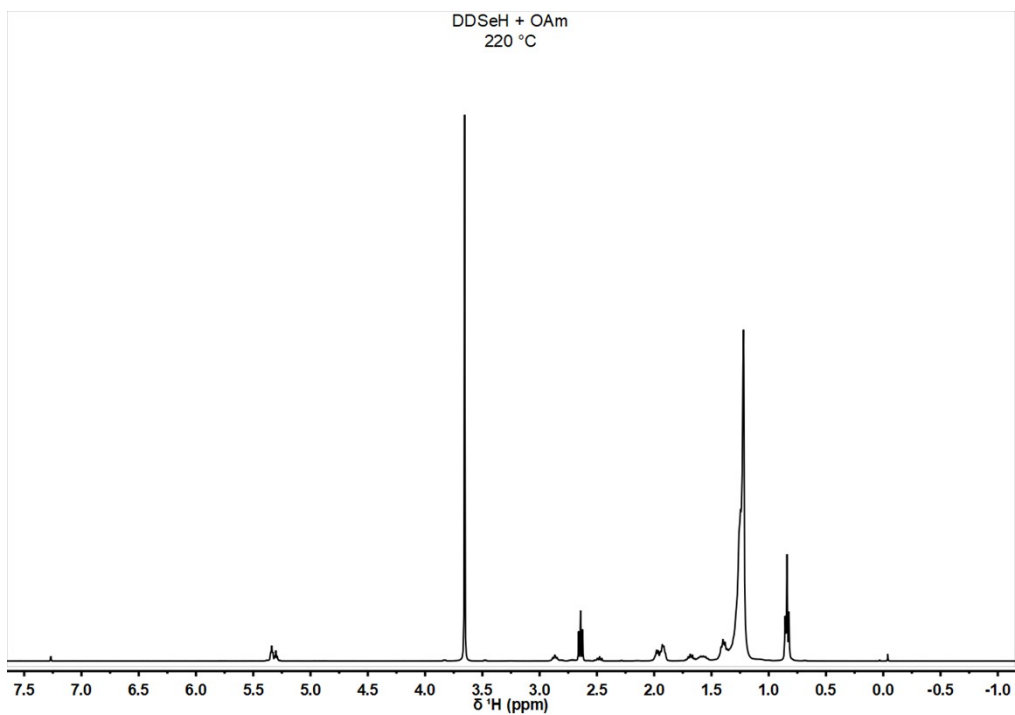

**Figure S6:**  $^1\text{H}$  NMR of DDSeH and oleylamine at 220 °C in  $\text{CDCl}_3$ . Dioxane internal standard at  $\delta = 3.71$  ppm

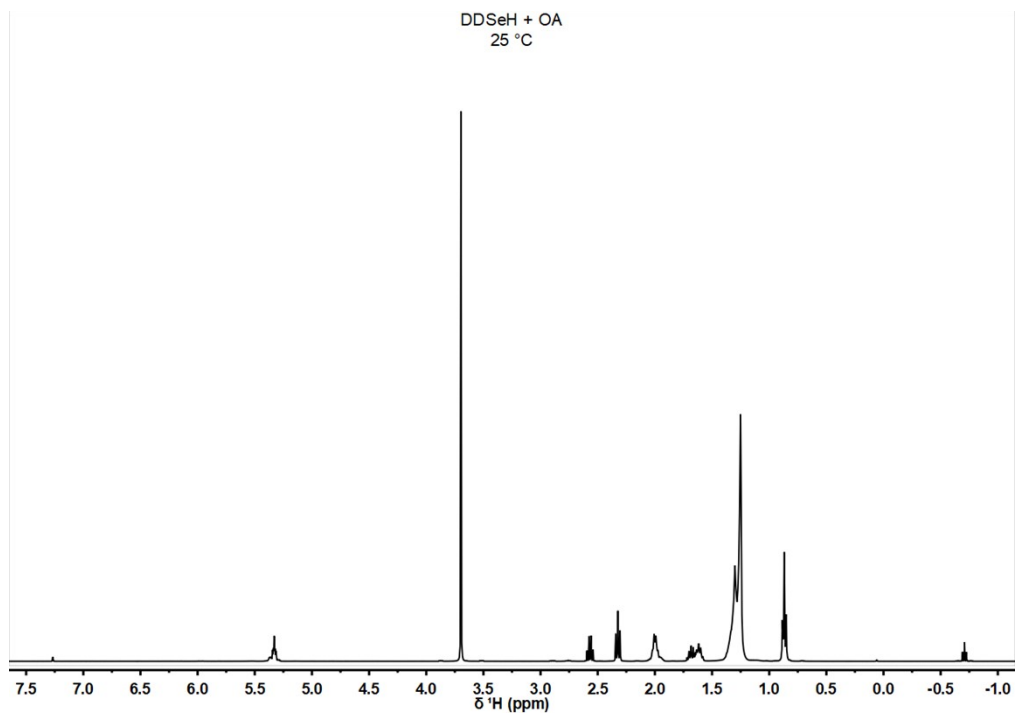

**Figure S7:**  $^1\text{H}$  NMR of DDSeH and oleic acid at 25 °C in  $\text{CDCl}_3$ . Dioxane internal standard at  $\delta = 3.71$  ppm

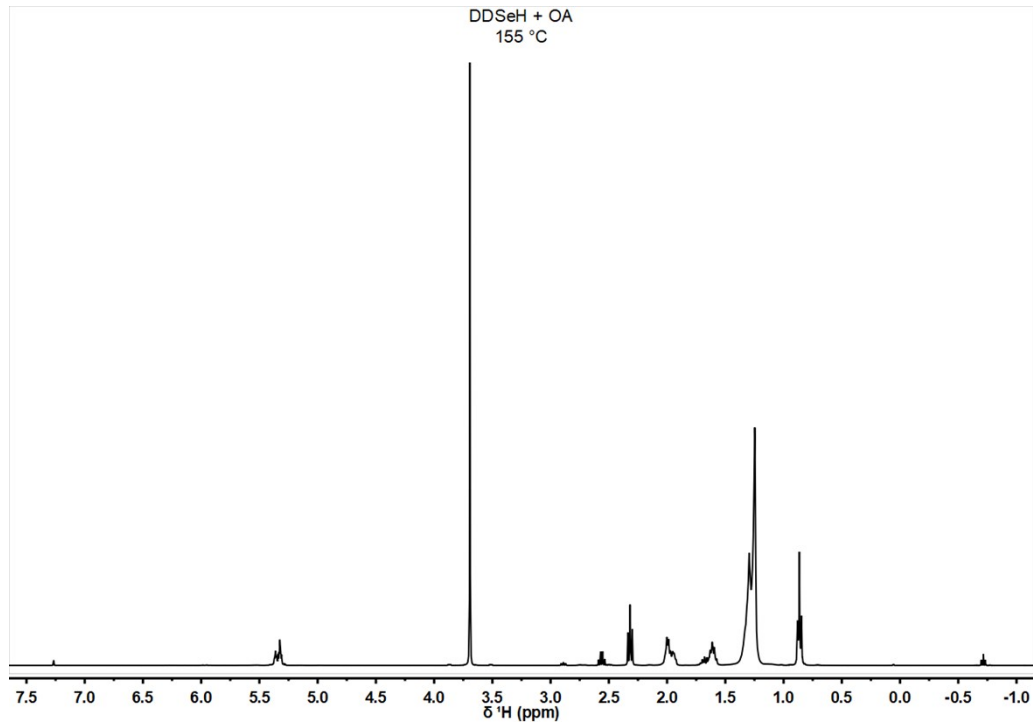

**Figure S8:**  $^1\text{H}$  NMR of DDSeH and oleic acid at 155 °C in  $\text{CDCl}_3$ . Dioxane internal standard at  $\delta = 3.71$  ppm

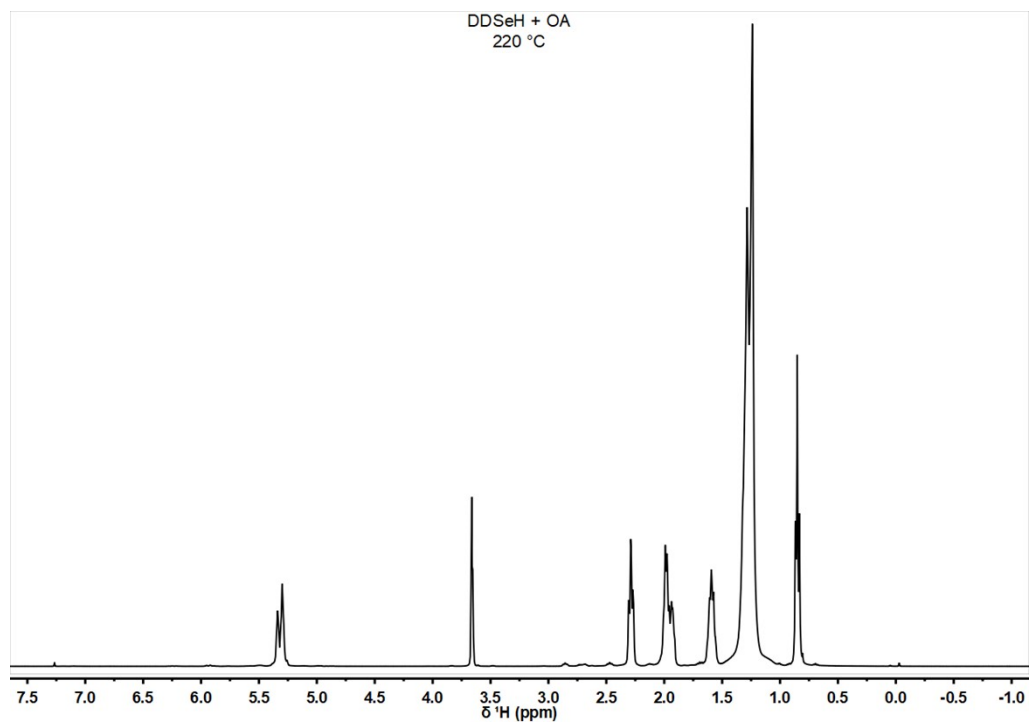

**Figure S9:**  $^1\text{H}$  NMR of DDSeH and oleic acid at 220 °C in  $\text{CDCl}_3$ . Dioxane internal standard at  $\delta = 3.71$  ppm

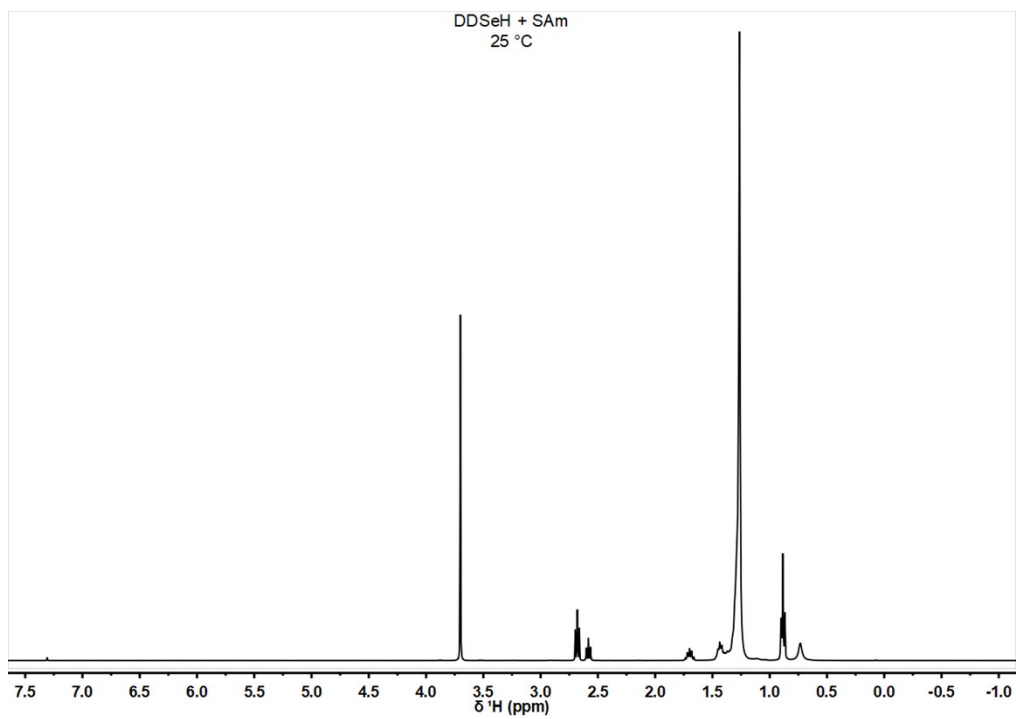

**Figure S10:**  $^1\text{H}$  NMR of DDSeH and stearylamine at 25 °C in  $\text{CDCl}_3$ . Dioxane internal standard at  $\delta = 3.71$  ppm

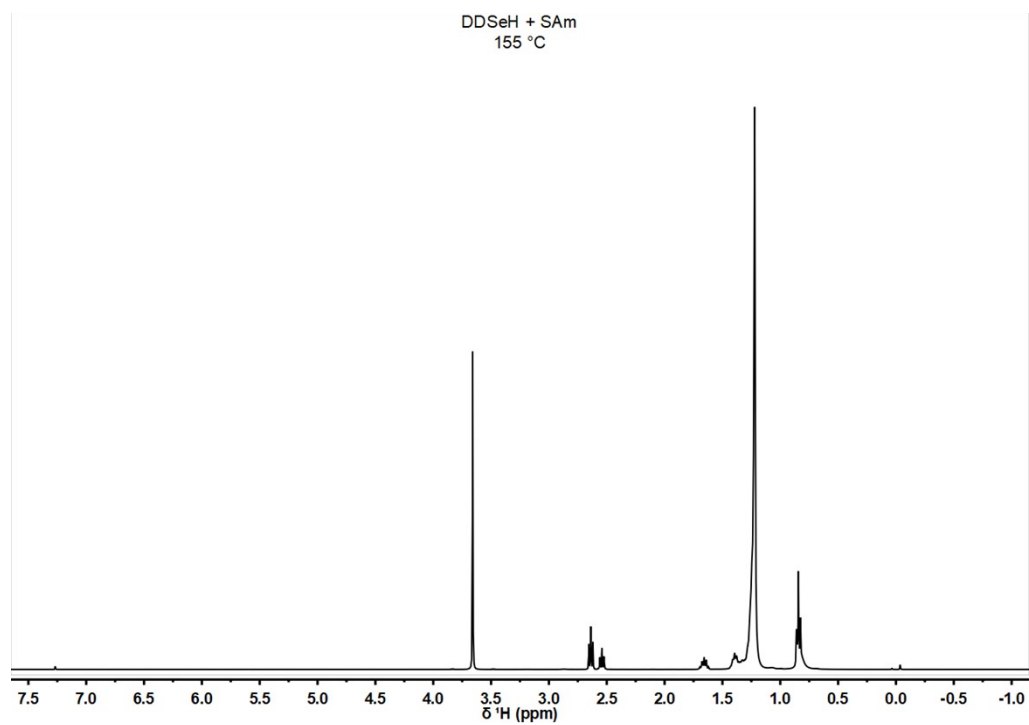

**Figure S11:**  $^1\text{H}$  NMR of DDSeH and stearylamine at 155 °C in  $\text{CDCl}_3$ . Dioxane internal standard at  $\delta = 3.71$  ppm

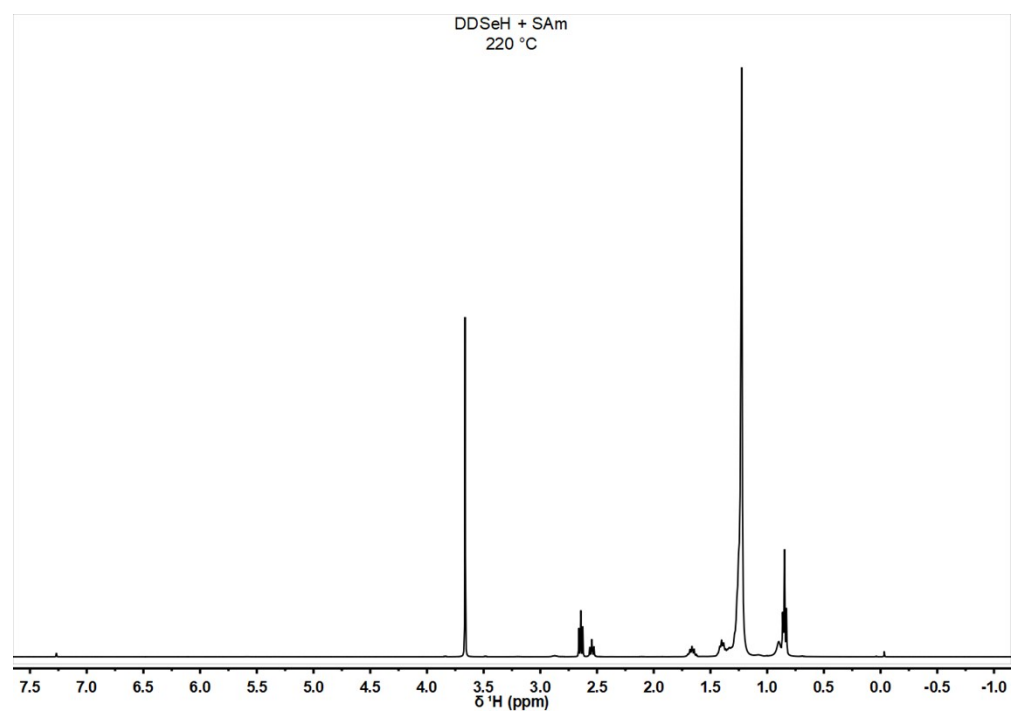

**Figure S12:**  $^1\text{H}$  NMR of DDSeH and stearylamine at 220 °C in  $\text{CDCl}_3$ . Dioxane internal standard at  $\delta = 3.71$  ppm



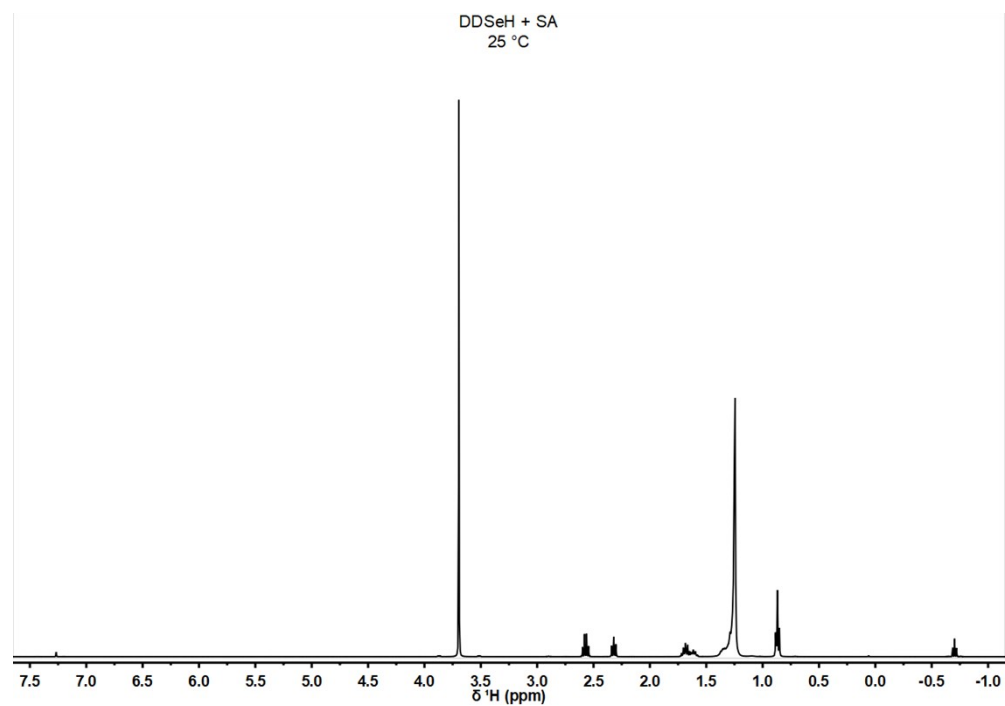

**Figure S13:**  $^1\text{H}$  NMR of DDSeH and stearic acid at 25 °C in  $\text{CDCl}_3$ . Dioxane internal standard at  $\delta = 3.71$  ppm

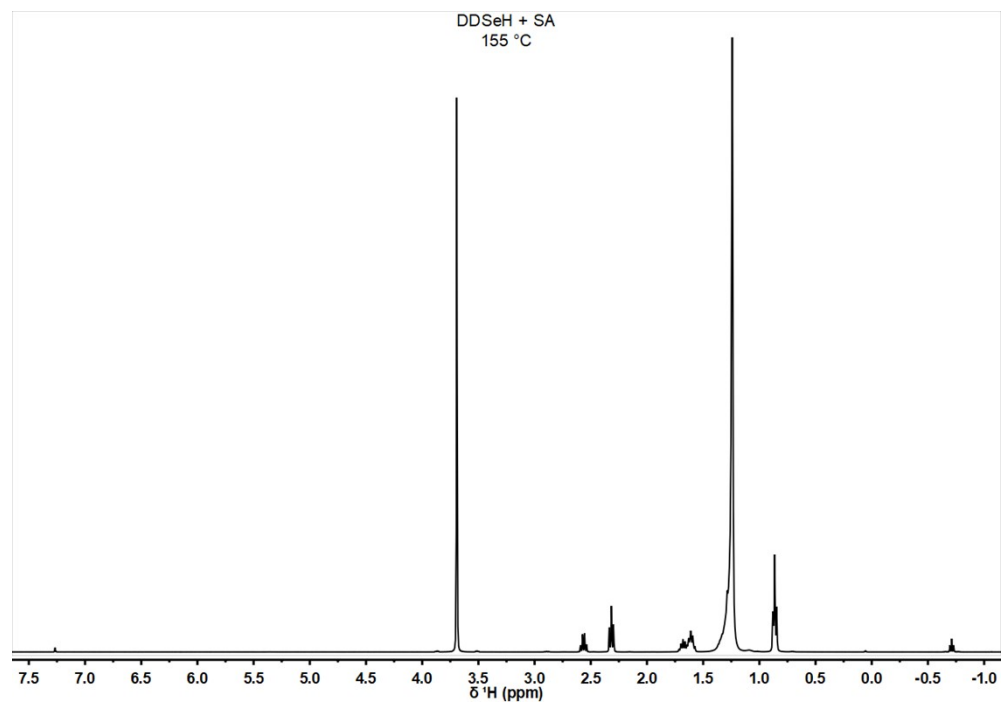

**Figure S14:**  $^1\text{H}$  NMR of DDSeH and stearic acid at 155 °C in  $\text{CDCl}_3$ . Dioxane internal standard at  $\delta = 3.71$  ppm

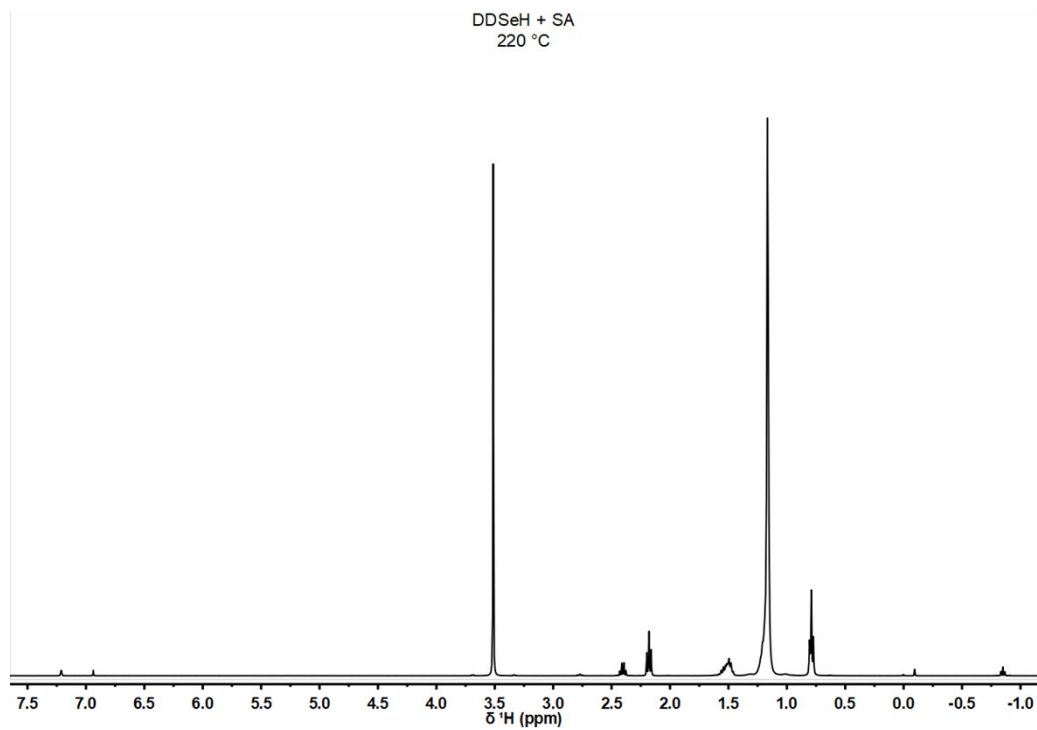

**Figure S15:**  $^1\text{H}$  NMR of DDSeH and stearic acid at 220 °C in  $\text{C}_6\text{D}_6$ . Dioxane internal standard at  $\delta = 3.71$  ppm

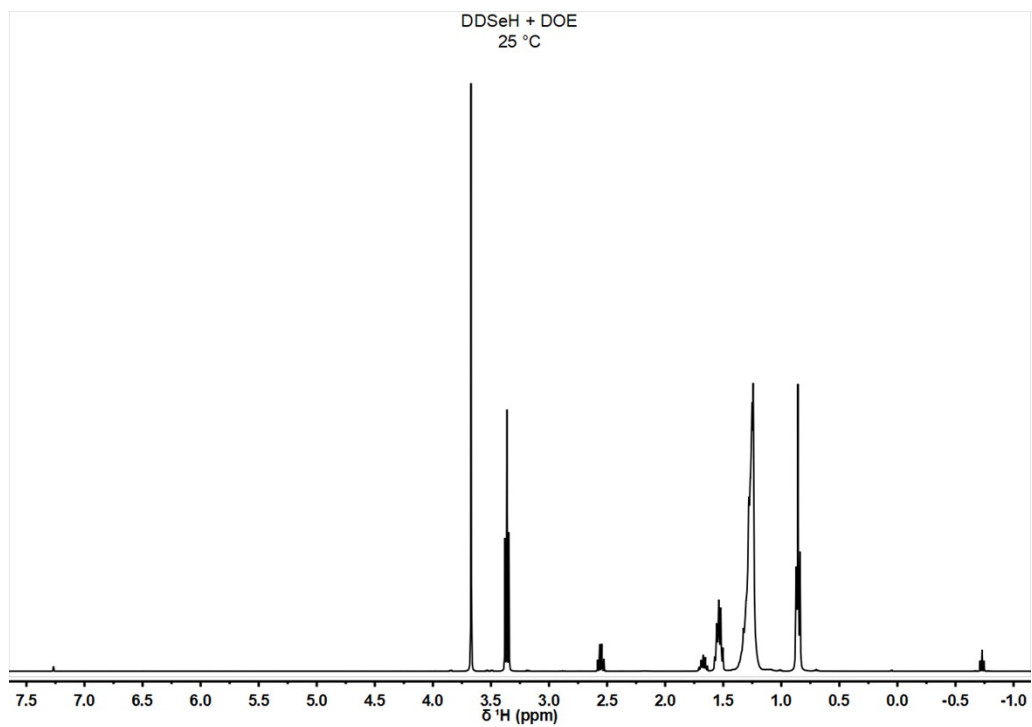

**Figure S16:**  $^1\text{H}$  NMR of DDSeH and DOE at 25 °C in  $\text{CDCl}_3$ . Dioxane internal standard at  $\delta = 3.71$  ppm

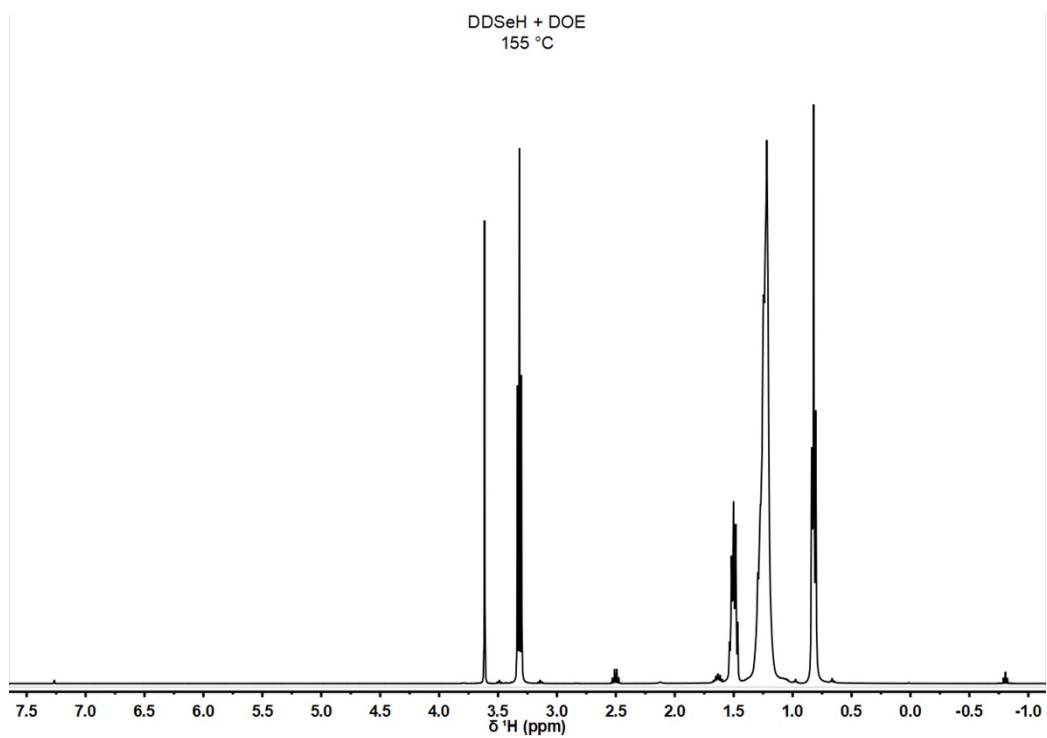

**Figure S17:**  $^1\text{H}$  NMR of DDSeH and DOE at 155 °C in  $\text{CDCl}_3$ . Dioxane internal standard at  $\delta = 3.71$  ppm

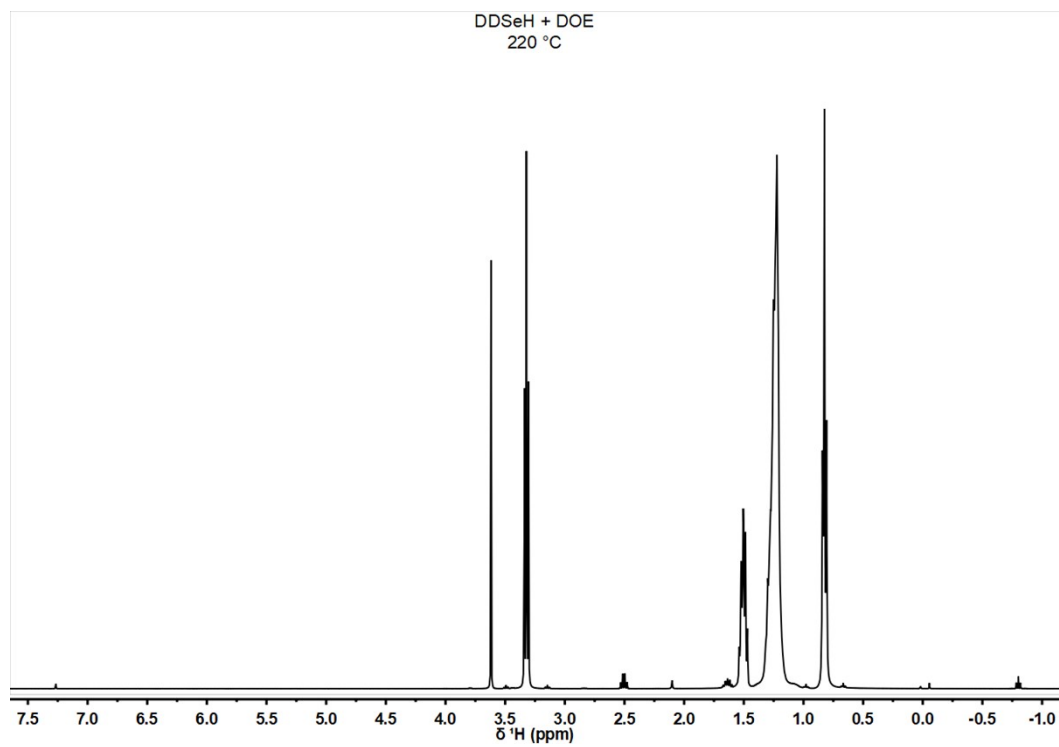

**Figure S18:**  $^1\text{H}$  NMR of DDSeH and DOE at 220 °C in  $\text{CDCl}_3$ . Dioxane internal standard at  $\delta = 3.71$  ppm

**$^{77}\text{H}$  NMR of all DDSeH and ligand combinations tested at 25 °C**

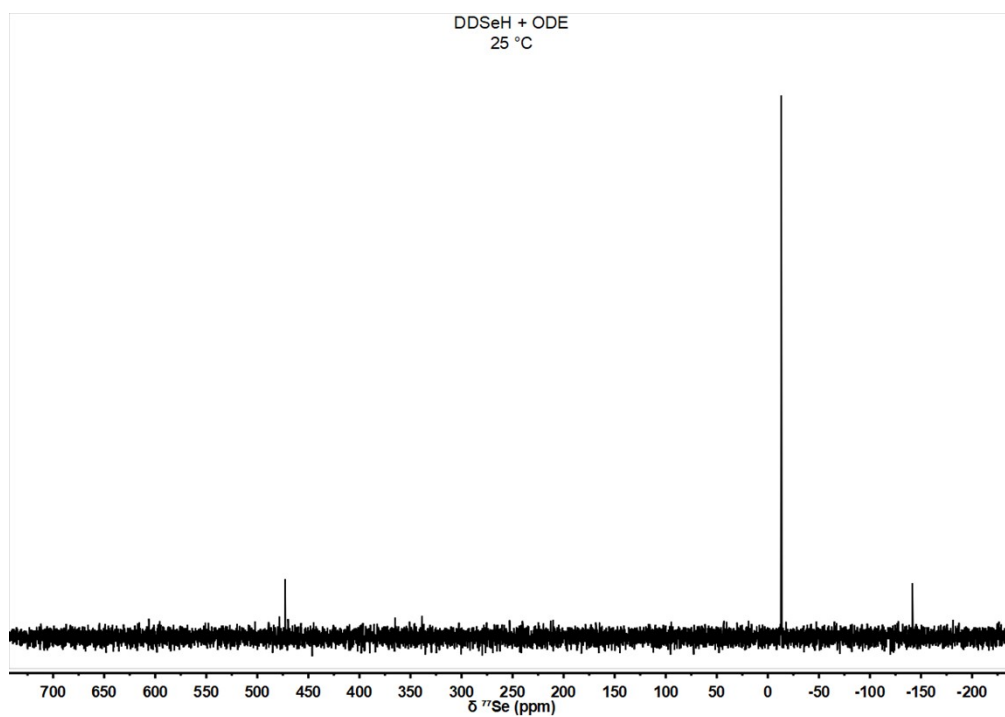

**Figure S19:**  $^{77}\text{Se}$  NMR of DDSeH and ODE at 25 °C in  $\text{CDCl}_3$ .

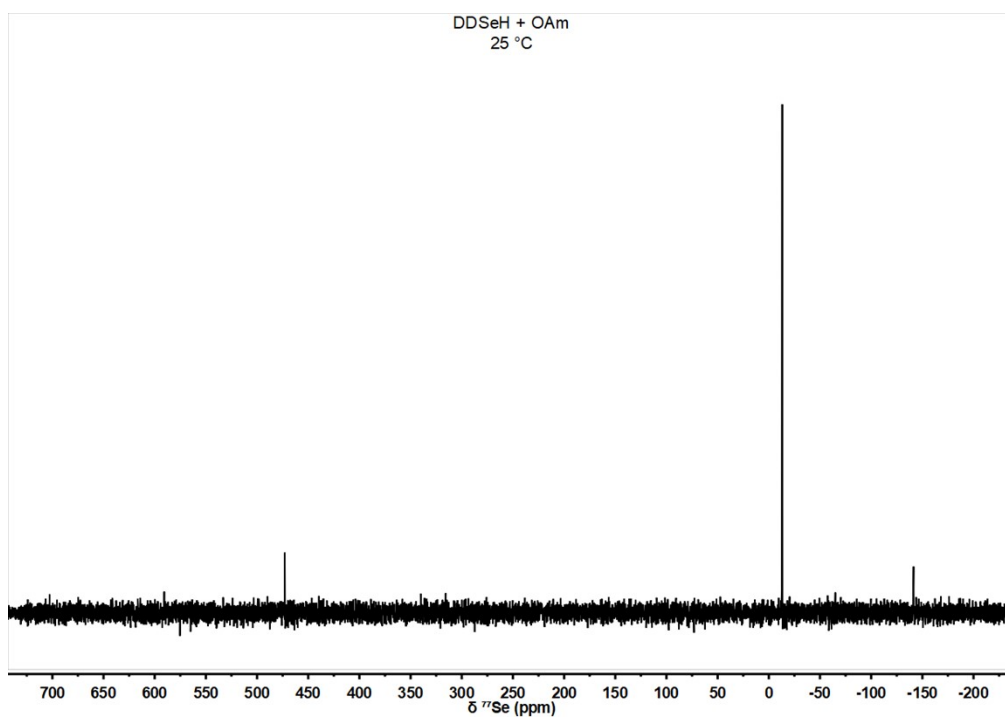

**Figure S20:**  $^{77}\text{Se}$  NMR of DDSeH and ODE at 25 °C in  $\text{CDCl}_3$ .

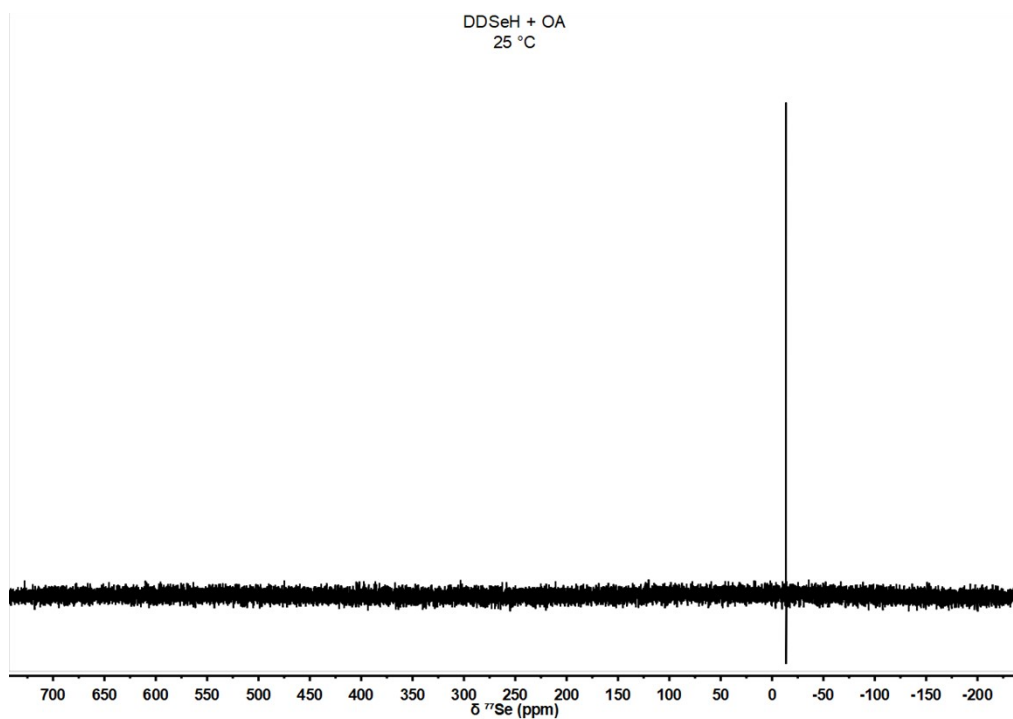

**Figure S21:**  $^{77}\text{Se}$  NMR of DDSeH and oleic acid 25 °C in  $\text{CDCl}_3$ .

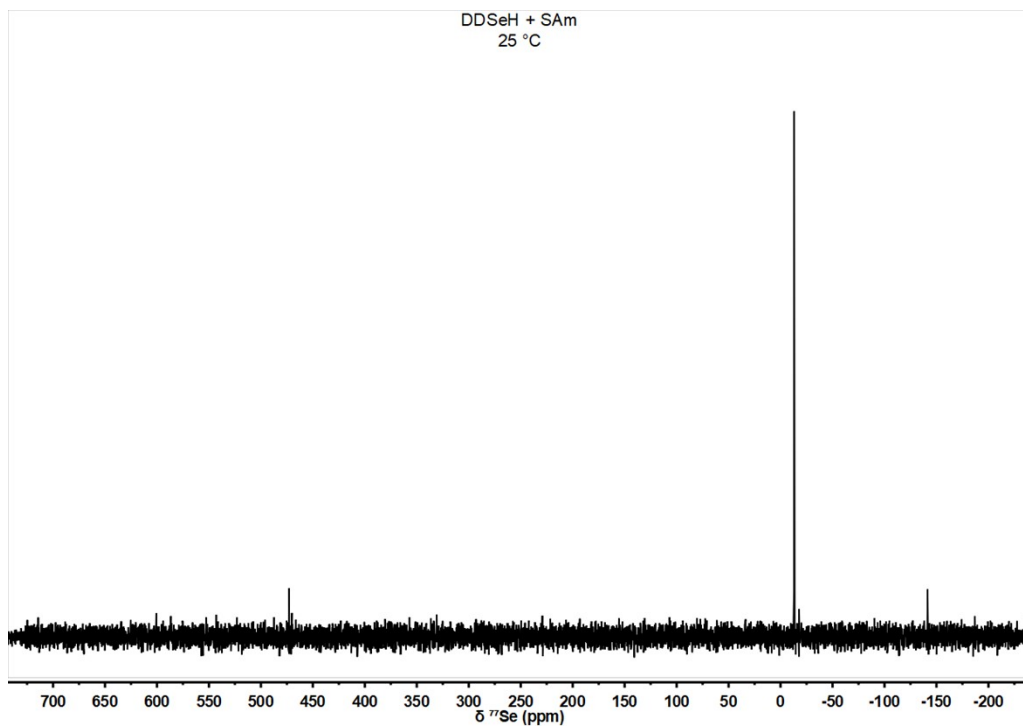

**Figure S22:**  $^{77}\text{Se}$  NMR of DDSeH and stearylamine at 25 °C in  $\text{CDCl}_3$ .

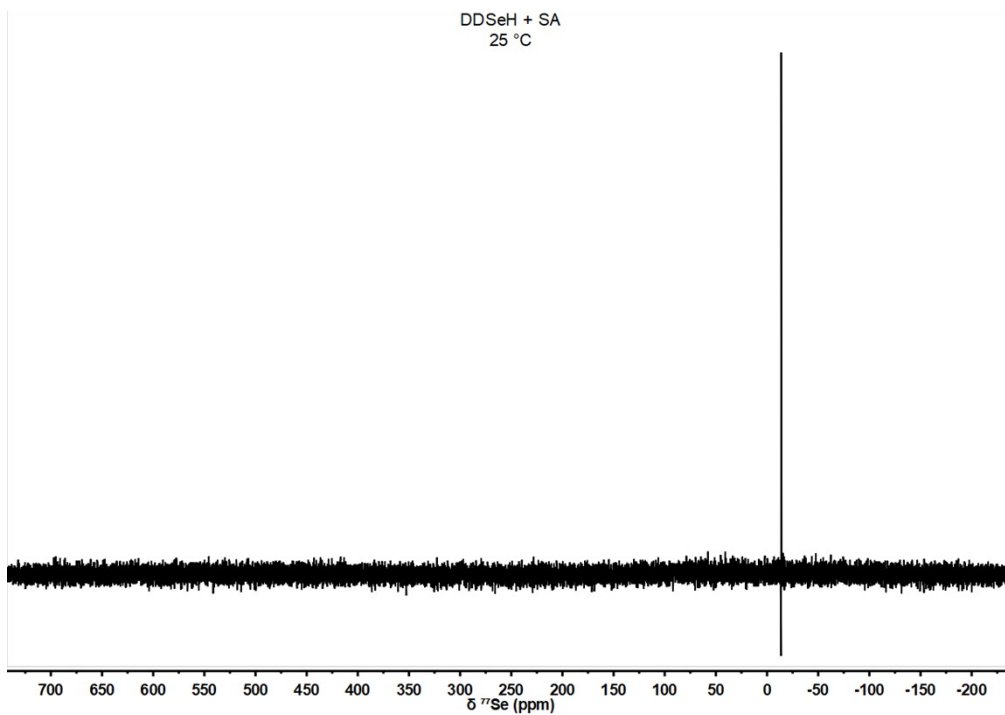

**Figure S23:**  $^{77}\text{Se}$  NMR of DDSeH and stearic acid at 25 °C in  $\text{CDCl}_3$ .

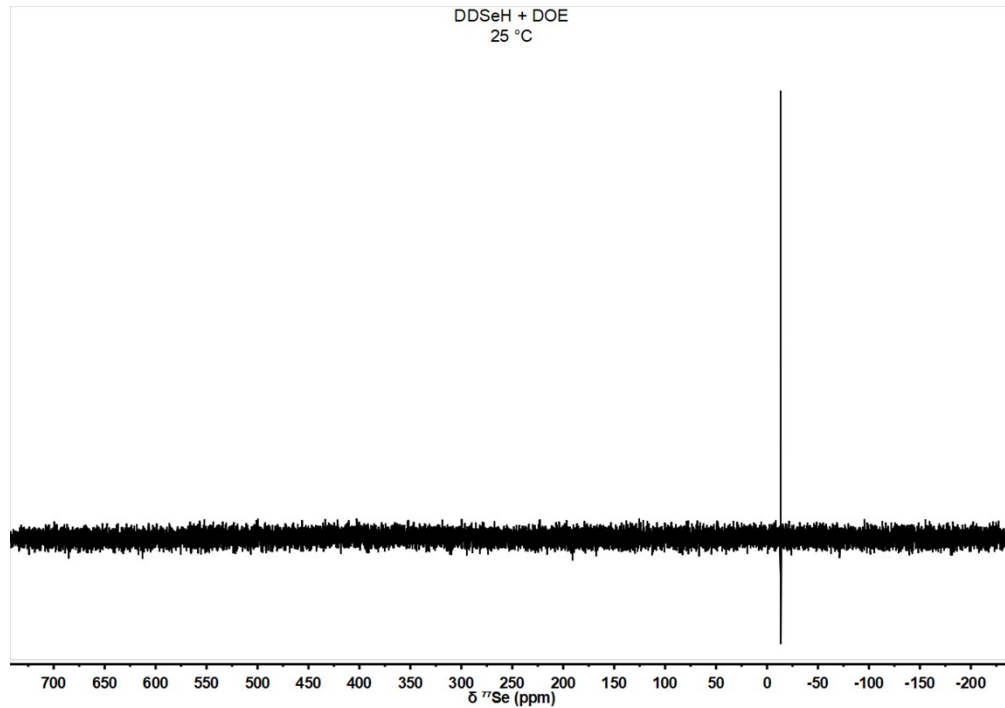

**Figure S24:**  $^{77}\text{Se}$  NMR of DDSeH and DOE at 25 °C in  $\text{CDCl}_3$ .

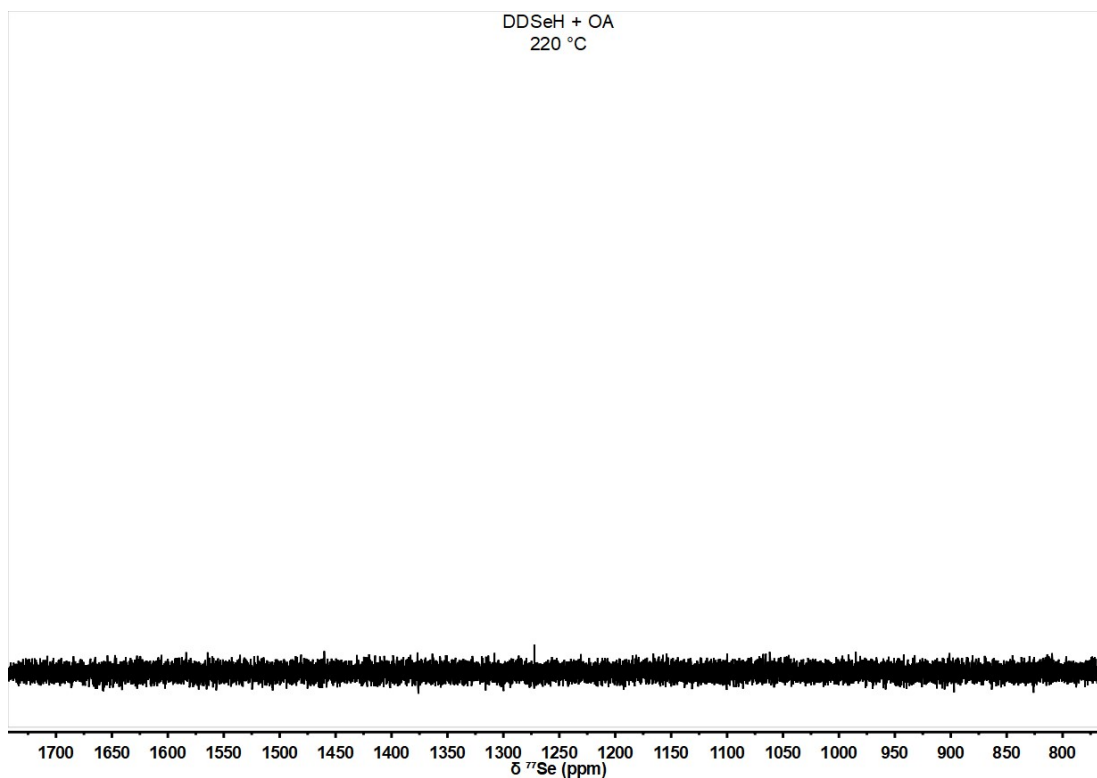

**Figure S25:** Upfield scan  $^{77}\text{Se}$  NMR of DDSeH and oleic acid at 220 °C in  $\text{CDCl}_3$

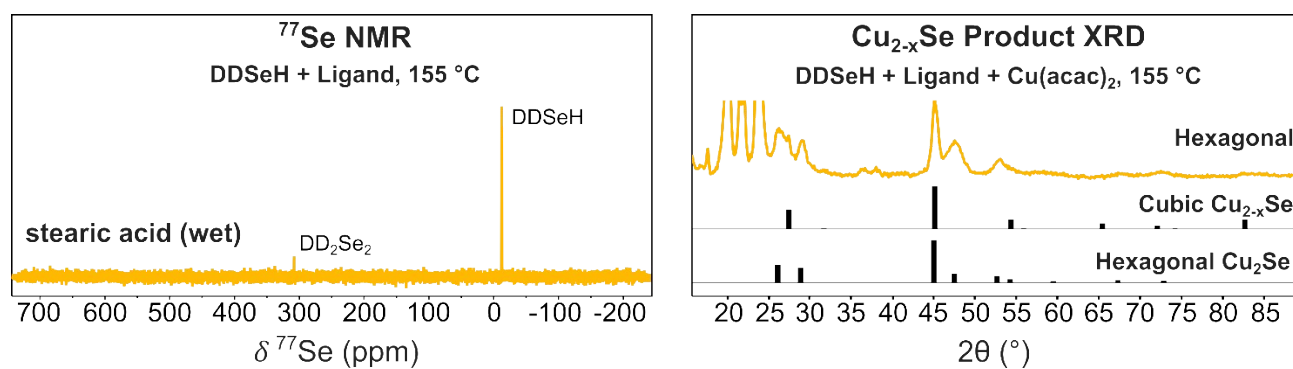

**Figure S26:**  $^{77}\text{Se}$  NMR and pXRD experiments illustrating that failure to properly dry/degas stearic acid produces the hexagonal phase of  $\text{Cu}_{2-x}\text{Se}$  nanocrystals.

### pXRD Analysis of Lead Acetate Paper

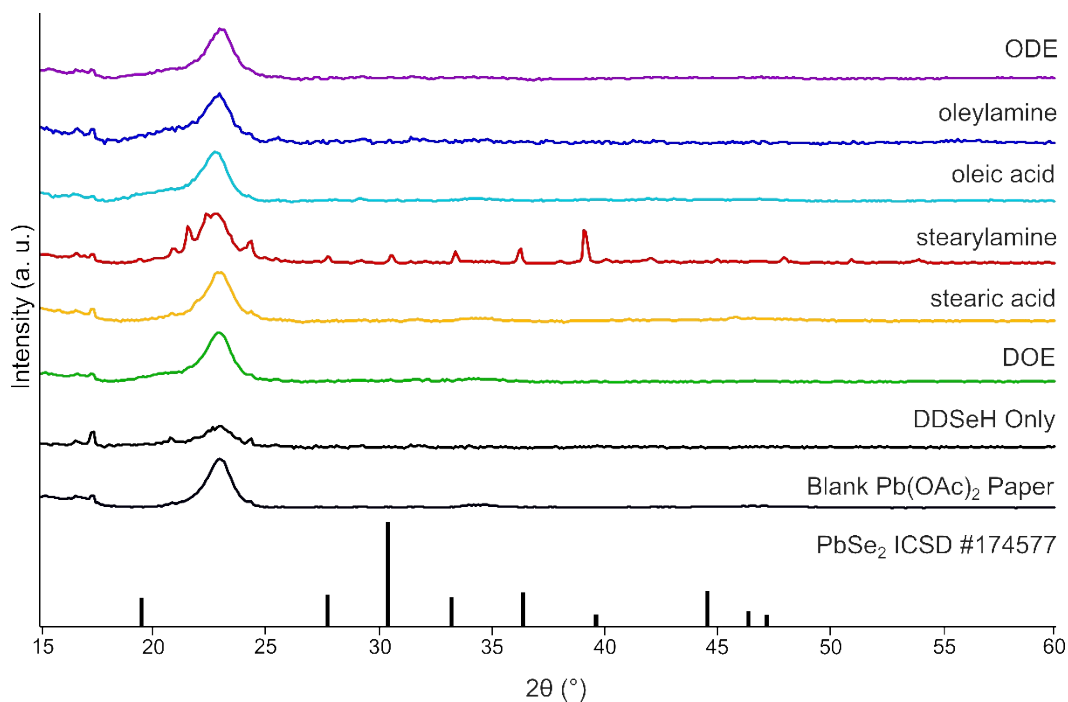

**Figure S27:** pXRD of lead acetate paper placed in reaction headspaces for studies at 155 °C. The formation of PbSe is indicative of H<sub>2</sub>Se gas evolution.

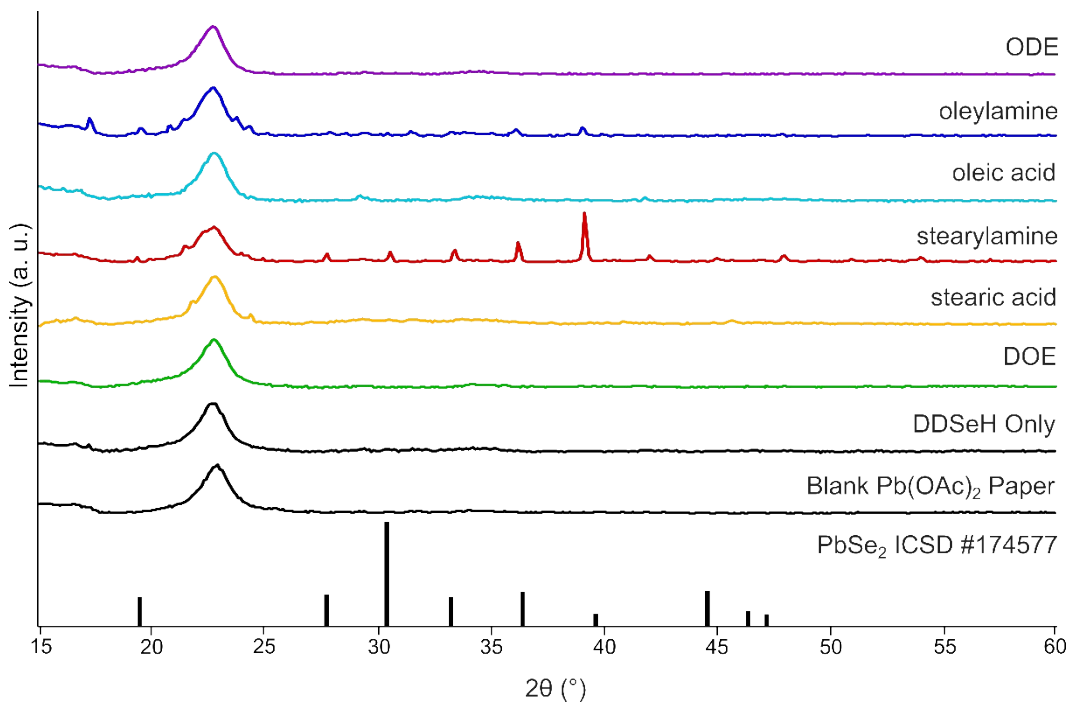

**Figure S28:** pXRD of lead acetate paper placed in reaction headspaces for studies at 220 °C. The formation of PbSe is indicative of H<sub>2</sub>Se gas evolution.



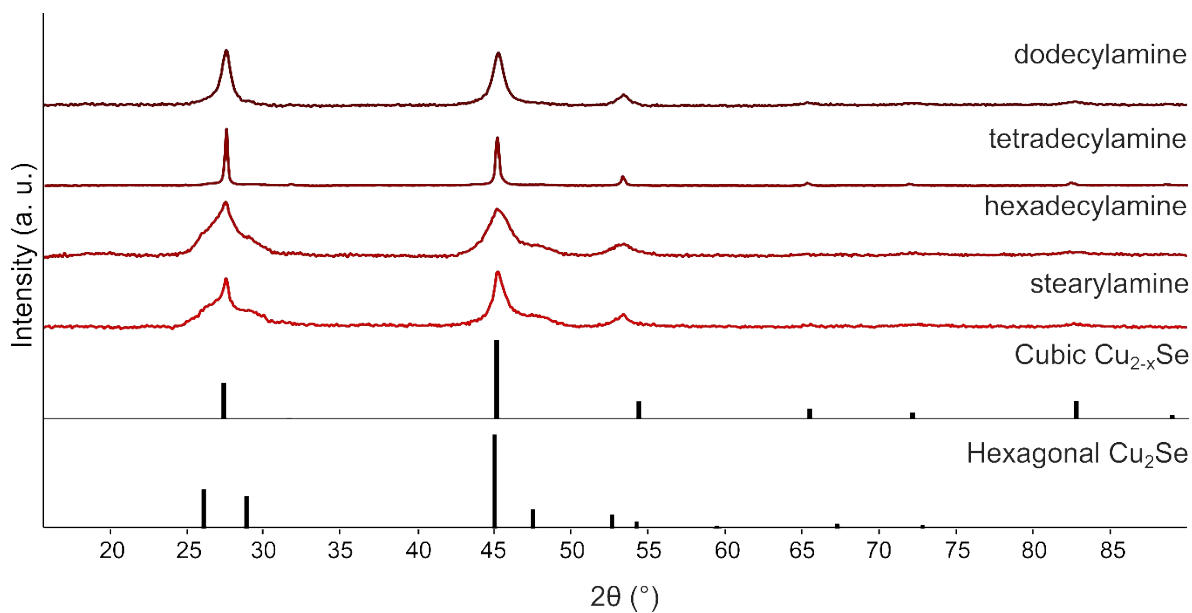

**Figure S29:** pXRD of copper selenide products from syntheses prepared in the presence of dodecylamine, tetradecylamine, hexadecylamine and stearylamine. Calculated patterns for cubic berzelianite  $\text{Cu}_{2-x}\text{Se}$  and hexagonal  $\text{Cu}_{2-x}\text{Se}$  used for Rietveld refinements of percent composition reported in Figure 3. All refinements have  $X^2 < 3$ .

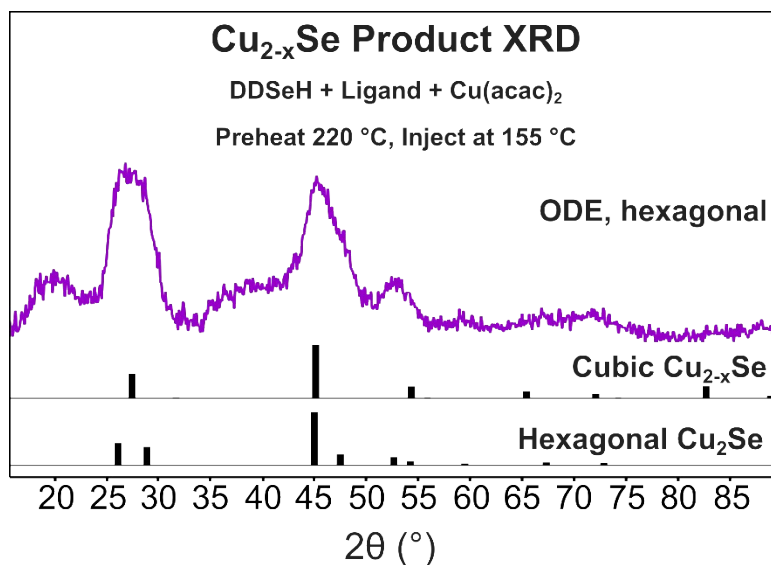

**Figure S30:** pXRD of copper selenide products from synthesis using ODE. DDSeH and ODE were preheated for 1 hr at 220 °C then cooled to 155 °C before Cu precursor injection.
